# Supplementary material
Source: publisher site journal article supplement (https://www.dovepress.com/get_supplementary_file.php?f=472387.xlsx)
Supplement: Supplementary file 1 [file get_supplementary_file.php]

## Sheet: Sheet1
Supplementray Table 1. Positive likelihood ratio (LR+) and Youden's index at different cut-off values.
Cut off values	Sensitivity	Specificity	LR +	Youden’s index
0	1	0	1	0
3.87917e-05	1	0.00168634	1.00169	0.00168634
5.03992e-05	1	0.00337268	1.00338	0.00337268
6.24814e-05	1	0.00505902	1.00508	0.00505902
8.14822e-05	1	0.00674536	1.00679	0.00674536
0.000110572	1	0.0084317	1.0085	0.0084317
0.000143985	1	0.010118	1.01022	0.010118
0.000172397	1	0.0118044	1.01195	0.0118044
0.000193729	1	0.0134907	1.01368	0.0134907
0.000218935	1	0.0151771	1.01541	0.0151771
0.000240794	1	0.0168634	1.01715	0.0168634
0.000246419	1	0.0185497	1.0189	0.0185497
0.000254219	1	0.0202361	1.02065	0.0202361
0.000264934	1	0.0219224	1.02241	0.0219224
0.000276294	1	0.0236088	1.02418	0.0236088
0.000283262	1	0.0252951	1.02595	0.0252951
0.000289363	1	0.0269815	1.02773	0.0269815
0.000295166	1	0.0286678	1.02951	0.0286678
0.000296337	1	0.0303541	1.0313	0.0303541
0.000297753	1	0.0320405	1.0331	0.0320405
0.000299352	1	0.0337268	1.0349	0.0337268
0.00030156	1	0.0354132	1.03671	0.0354132
0.000306231	1	0.0370995	1.03853	0.0370995
0.000310538	1	0.0387858	1.04035	0.0387858
0.000312177	1	0.0404722	1.04218	0.0404722
0.000318352	1	0.0421585	1.04401	0.0421585
0.000324975	1	0.0438449	1.04586	0.0438449
0.000333535	1	0.0455312	1.0477	0.0455312
0.000342295	1	0.0472175	1.04956	0.0472175
0.000350516	1	0.0489039	1.05142	0.0489039
0.000368107	1	0.0505902	1.05329	0.0505902
0.0003808	1	0.0522766	1.05516	0.0522766
0.000386363	1	0.0539629	1.05704	0.0539629
0.000402037	1	0.0556492	1.05893	0.0556492
0.000420401	1	0.0573356	1.06082	0.0573356
0.00042908	1	0.0590219	1.06272	0.0590219
0.000433285	1	0.0607083	1.06463	0.0607083
0.000456019	1	0.0623946	1.06655	0.0623946
0.000478715	1	0.0640809	1.06847	0.0640809
0.000484744	1	0.0657673	1.0704	0.0657673
0.000491039	1	0.0674536	1.07233	0.0674536
0.000497763	1	0.06914	1.07428	0.06914
0.00050749	1	0.0708263	1.07623	0.0708263
0.000512153	1	0.0725126	1.07818	0.0725126
0.000537264	1	0.074199	1.08015	0.074199
0.000604221	1	0.0758853	1.08212	0.0758853
0.000650394	1	0.0775717	1.0841	0.0775717
0.000658366	1	0.079258	1.08608	0.079258
0.000682184	1	0.0809444	1.08807	0.0809444
0.000722989	1	0.0826307	1.09007	0.0826307
0.000749146	1	0.084317	1.09208	0.084317
0.000755075	1	0.0860034	1.0941	0.0860034
0.000765661	1	0.0876897	1.09612	0.0876897
0.000781934	1	0.0893761	1.09815	0.0893761
0.000803469	1	0.0910624	1.10019	0.0910624
0.000820043	1	0.0927487	1.10223	0.0927487
0.00082989	1	0.0944351	1.10428	0.0944351
0.000843087	1	0.0961214	1.10634	0.0961214
0.000855238	1	0.0978078	1.10841	0.0978078
0.000865177	1	0.0994941	1.11049	0.0994941
0.00087764	1	0.10118	1.11257	0.10118
0.000899243	1	0.102867	1.11466	0.102867
0.000914745	1	0.104553	1.11676	0.104553
0.000928244	1	0.106239	1.11887	0.106239
0.000949618	1	0.107926	1.12098	0.107926
0.000962823	1	0.109612	1.12311	0.109612
0.000982123	1	0.111298	1.12524	0.111298
0.00100793	1	0.112985	1.12738	0.112985
0.00101707	1	0.114671	1.12952	0.114671
0.00102886	1	0.116358	1.13168	0.116358
0.00107214	1	0.118044	1.13384	0.118044
0.00111824	1	0.11973	1.13602	0.11973
0.00115664	1	0.121417	1.1382	0.121417
0.00118404	1	0.123103	1.14038	0.123103
0.00118918	1	0.124789	1.14258	0.124789
0.00119982	1	0.126476	1.14479	0.126476
0.00123374	1	0.128162	1.147	0.128162
0.00131763	1	0.129848	1.14922	0.129848
0.00138484	1	0.131535	1.15146	0.131535
0.00139933	1	0.133221	1.1537	0.133221
0.00145601	1	0.134907	1.15595	0.134907
0.00151655	1	0.136594	1.1582	0.136594
0.00153571	1	0.13828	1.16047	0.13828
0.00157829	1	0.139966	1.16275	0.139966
0.00161367	1	0.141653	1.16503	0.141653
0.00161792	1	0.143339	1.16732	0.143339
0.00162828	1	0.145025	1.16963	0.145025
0.00164219	1	0.146712	1.17194	0.146712
0.00165009	1	0.148398	1.17426	0.148398
0.00170054	1	0.150084	1.17659	0.150084
0.00177257	1	0.151771	1.17893	0.151771
0.00179761	1	0.153457	1.18127	0.153457
0.00181973	1	0.155143	1.18363	0.155143
0.00184398	1	0.15683	1.186	0.15683
0.00186741	1	0.158516	1.18838	0.158516
0.00193293	1	0.160202	1.19076	0.160202
0.00199493	1	0.161889	1.19316	0.161889
0.00201682	1	0.163575	1.19556	0.163575
0.00204187	1	0.165261	1.19798	0.165261
0.00212481	1	0.166948	1.2004	0.166948
0.00223119	1	0.168634	1.20284	0.168634
0.00229918	1	0.17032	1.20528	0.17032
0.00237211	1	0.172007	1.20774	0.172007
0.00246887	1	0.173693	1.2102	0.173693
0.00252031	1	0.175379	1.21268	0.175379
0.00252515	1	0.177066	1.21516	0.177066
0.00255277	1	0.178752	1.21766	0.178752
0.00258463	1	0.180438	1.22016	0.180438
0.00260968	1	0.182125	1.22268	0.182125
0.00267778	1	0.183811	1.22521	0.183811
0.00273723	1	0.185497	1.22774	0.185497
0.00277233	1	0.187184	1.23029	0.187184
0.00283053	1	0.18887	1.23285	0.18887
0.00289184	1	0.190556	1.23542	0.190556
0.00291956	1	0.192243	1.238	0.192243
0.00292094	1	0.193929	1.24059	0.193929
0.00292265	1	0.195616	1.24319	0.195616
0.00294594	1	0.197302	1.2458	0.197302
0.00302275	1	0.198988	1.24842	0.198988
0.00308873	1	0.200675	1.25105	0.200675
0.00310061	1	0.202361	1.2537	0.202361
0.00311457	1	0.204047	1.25636	0.204047
0.00315176	1	0.205734	1.25902	0.205734
0.00320031	1	0.20742	1.2617	0.20742
0.00323218	1	0.209106	1.26439	0.209106
0.00324299	1	0.210793	1.26709	0.210793
0.0032636	1	0.212479	1.26981	0.212479
0.00328141	1	0.214165	1.27253	0.214165
0.00329313	1	0.215852	1.27527	0.215852
0.00331388	1	0.217538	1.27802	0.217538
0.00335362	1	0.219224	1.28078	0.219224
0.00338713	1	0.220911	1.28355	0.220911
0.00340064	1	0.222597	1.28633	0.222597
0.00345528	1	0.224283	1.28913	0.224283
0.00352419	1	0.22597	1.29194	0.22597
0.00354894	1	0.227656	1.29476	0.227656
0.00355654	1	0.229342	1.29759	0.229342
0.0035682	1	0.231029	1.30044	0.231029
0.0036229	1	0.232715	1.3033	0.232715
0.00369729	1	0.234401	1.30617	0.234401
0.00373352	1	0.236088	1.30905	0.236088
0.00374599	1	0.237774	1.31195	0.237774
0.00377928	1	0.23946	1.31486	0.23946
0.00381751	1	0.241147	1.31778	0.241147
0.0038241	1	0.242833	1.32071	0.242833
0.00384045	1	0.244519	1.32366	0.244519
0.00386345	1	0.246206	1.32662	0.246206
0.00388209	1	0.247892	1.3296	0.247892
0.00389474	1	0.249578	1.33258	0.249578
0.00394572	1	0.251265	1.33559	0.251265
0.00399989	1	0.252951	1.3386	0.252951
0.00400861	1	0.254637	1.34163	0.254637
0.00401889	1	0.256324	1.34467	0.256324
0.00403795	1	0.25801	1.34773	0.25801
0.00405369	1	0.259696	1.3508	0.259696
0.00406737	1	0.261383	1.35388	0.261383
0.0040847	1	0.263069	1.35698	0.263069
0.0040942	1	0.264755	1.36009	0.264755
0.0041195	1	0.266442	1.36322	0.266442
0.00415948	1	0.268128	1.36636	0.268128
0.00420818	1	0.269815	1.36952	0.269815
0.00424825	1	0.271501	1.37269	0.271501
0.00426339	1	0.273187	1.37587	0.273187
0.00427817	1	0.274874	1.37907	0.274874
0.00429325	1	0.27656	1.38228	0.27656
0.00430556	1	0.278246	1.38551	0.278246
0.00432482	1	0.279933	1.38876	0.279933
0.00433873	1	0.281619	1.39202	0.281619
0.00434658	1	0.283305	1.39529	0.283305
0.00438301	1	0.284992	1.39858	0.284992
0.00443662	1	0.286678	1.40189	0.286678
0.00447848	1	0.288364	1.40521	0.288364
0.00450688	1	0.290051	1.40855	0.290051
0.00452352	1	0.291737	1.4119	0.291737
0.00453714	1	0.293423	1.41527	0.293423
0.00454624	1	0.29511	1.41866	0.29511
0.00455773	1	0.296796	1.42206	0.296796
0.00460211	1	0.300169	1.42892	0.300169
0.00466278	1	0.301855	1.43237	0.301855
0.00469164	1	0.303541	1.43584	0.303541
0.00469508	1	0.305228	1.43932	0.305228
0.00470751	1	0.306914	1.44282	0.306914
0.00474276	1	0.3086	1.44634	0.3086
0.00478297	1	0.310287	1.44988	0.310287
0.00480159	1	0.311973	1.45343	0.311973
0.0048151	1	0.313659	1.457	0.313659
0.00488031	1	0.315346	1.46059	0.315346
0.00493689	1	0.317032	1.4642	0.317032
0.00494374	1	0.318718	1.46782	0.318718
0.00495252	1	0.320405	1.47146	0.320405
0.00497605	1	0.322091	1.47512	0.322091
0.00500045	1	0.323777	1.4788	0.323777
0.00500821	1	0.325464	1.4825	0.325464
0.00502665	1	0.32715	1.48622	0.32715
0.00506509	1	0.328836	1.48995	0.328836
0.00509324	1	0.330523	1.4937	0.330523
0.00510499	1	0.332209	1.49747	0.332209
0.0051332	1	0.333895	1.50127	0.333895
0.00515616	1	0.335582	1.50508	0.335582
0.00519628	1	0.337268	1.50891	0.337268
0.00523773	1	0.338954	1.51276	0.338954
0.00524632	1	0.340641	1.51662	0.340641
0.00525537	1	0.342327	1.52051	0.342327
0.00525902	1	0.344013	1.52442	0.344013
0.00528117	1	0.3457	1.52835	0.3457
0.00531603	1	0.347386	1.5323	0.347386
0.00535992	1	0.349073	1.53627	0.349073
0.00539029	1	0.350759	1.54026	0.350759
0.00539274	1	0.352445	1.54427	0.352445
0.00539813	1	0.354132	1.5483	0.354132
0.00541272	1	0.355818	1.55236	0.355818
0.00542731	1	0.357504	1.55643	0.357504
0.00543364	1	0.359191	1.56053	0.359191
0.00543787	1	0.360877	1.56464	0.360877
0.00546466	1	0.362563	1.56878	0.362563
0.0054952	1	0.36425	1.57294	0.36425
0.00550687	1	0.365936	1.57713	0.365936
0.00551927	1	0.367622	1.58133	0.367622
0.00553864	1	0.369309	1.58556	0.369309
0.00558147	1	0.370995	1.58981	0.370995
0.00561283	1	0.372681	1.59409	0.372681
0.00562437	1	0.374368	1.59838	0.374368
0.00564092	1	0.376054	1.6027	0.376054
0.00565189	1	0.37774	1.60705	0.37774
0.00568442	1	0.379427	1.61141	0.379427
0.00572749	1	0.381113	1.6158	0.381113
0.00575265	1	0.382799	1.62022	0.382799
0.00577455	1	0.384486	1.62466	0.384486
0.00578574	1	0.386172	1.62912	0.386172
0.00580511	1	0.389545	1.63812	0.389545
0.00582576	1	0.391231	1.64266	0.391231
0.00586663	1	0.392917	1.64722	0.392917
0.00591572	1	0.394604	1.65181	0.394604
0.00593147	1	0.39629	1.65642	0.39629
0.00594747	1	0.397976	1.66106	0.397976
0.00598896	1	0.399663	1.66573	0.399663
0.00607365	1	0.401349	1.67042	0.401349
0.00613374	1	0.403035	1.67514	0.403035
0.00617431	1	0.404722	1.67989	0.404722
0.0062103	1	0.406408	1.68466	0.406408
0.00624836	1	0.408094	1.68946	0.408094
0.00628792	1	0.409781	1.69429	0.409781
0.00629253	1	0.411467	1.69914	0.411467
0.00631848	1	0.413153	1.70402	0.413153
0.00634673	1	0.41484	1.70893	0.41484
0.00635399	1	0.416526	1.71387	0.416526
0.006369	1	0.418212	1.71884	0.418212
0.00639981	1	0.419899	1.72384	0.419899
0.00642211	1	0.421585	1.72886	0.421585
0.00646751	1	0.423272	1.73392	0.423272
0.00653149	1	0.424958	1.739	0.424958
0.00655806	1	0.426644	1.74412	0.426644
0.00657987	1	0.428331	1.74926	0.428331
0.00659656	1	0.430017	1.75444	0.430017
0.00662996	1	0.431703	1.75964	0.431703
0.00667228	1	0.43339	1.76488	0.43339
0.00669153	1	0.435076	1.77015	0.435076
0.00670534	1	0.436762	1.77545	0.436762
0.00672024	1	0.438449	1.78078	0.438449
0.00674114	1	0.440135	1.78614	0.440135
0.00675397	1	0.441821	1.79154	0.441821
0.0067607	1	0.443508	1.79697	0.443508
0.00681787	1	0.445194	1.80243	0.445194
0.00687252	1	0.44688	1.80793	0.44688
0.0068788	1	0.448567	1.81346	0.448567
0.0068937	1	0.450253	1.81902	0.450253
0.00691325	1	0.451939	1.82462	0.451939
0.00693534	1	0.453626	1.83025	0.453626
0.00695006	1	0.455312	1.83591	0.455312
0.00695229	1	0.456998	1.84161	0.456998
0.00698423	1	0.458685	1.84735	0.458685
0.00701646	1	0.460371	1.85312	0.460371
0.00704684	1	0.462057	1.85893	0.462057
0.00709346	1	0.463744	1.86478	0.463744
0.00711345	1	0.46543	1.87066	0.46543
0.00713361	1	0.467116	1.87658	0.467116
0.00718737	1	0.468803	1.88254	0.468803
0.00725602	1	0.470489	1.88854	0.470489
0.00729913	1	0.472175	1.89457	0.472175
0.00733592	1	0.473862	1.90064	0.473862
0.00737935	1	0.475548	1.90675	0.475548
0.00742597	1	0.477234	1.9129	0.477234
0.00748446	1	0.478921	1.91909	0.478921
0.00754126	1	0.480607	1.92532	0.480607
0.00760912	1	0.482293	1.9316	0.482293
0.0076543	1	0.48398	1.93791	0.48398
0.00766831	1	0.485666	1.94426	0.485666
0.00770026	1	0.487352	1.95066	0.487352
0.00777566	1	0.489039	1.9571	0.489039
0.00783366	1	0.490725	1.96358	0.490725
0.00784692	1	0.492411	1.9701	0.492411
0.00789433	1	0.494098	1.97667	0.494098
0.00794911	1	0.495784	1.98328	0.495784
0.00797489	1	0.49747	1.98993	0.49747
0.00802453	1	0.499157	1.99663	0.499157
0.00812659	1	0.500843	2.00338	0.500843
0.00819408	1	0.50253	2.01017	0.50253
0.00827435	1	0.504216	2.01701	0.504216
0.00841555	1	0.505902	2.02389	0.505902
0.0084988	1	0.507589	2.03082	0.507589
0.00852177	1	0.509275	2.0378	0.509275
0.00856717	1	0.510961	2.04483	0.510961
0.00866517	1	0.512648	2.0519	0.512648
0.0087692	1	0.514334	2.05903	0.514334
0.00885096	1	0.51602	2.0662	0.51602
0.00899012	1	0.517707	2.07343	0.517707
0.00909594	1	0.519393	2.0807	0.519393
0.00910264	1	0.521079	2.08803	0.521079
0.00916165	1	0.522766	2.09541	0.522766
0.009326	1	0.524452	2.10284	0.524452
0.00943891	1	0.526138	2.11032	0.526138
0.00946944	1	0.527825	2.11786	0.527825
0.00949894	1	0.529511	2.12545	0.529511
0.00952987	1	0.531197	2.13309	0.531197
0.00958502	1	0.532884	2.14079	0.532884
0.00968616	1	0.53457	2.14855	0.53457
0.00984359	1	0.536256	2.15636	0.536256
0.00993958	1	0.537943	2.16423	0.537943
0.00996793	1	0.539629	2.17216	0.539629
0.00999239	1	0.541315	2.18015	0.541315
0.0100464	1	0.543002	2.18819	0.543002
0.0100967	1	0.544688	2.1963	0.544688
0.0102813	1	0.546374	2.20446	0.546374
0.0104948	1	0.548061	2.21269	0.548061
0.010589	1	0.549747	2.22097	0.549747
0.0106625	1	0.551433	2.22932	0.551433
0.0106795	1	0.55312	2.23774	0.55312
0.01074	1	0.554806	2.24621	0.554806
0.0108113	1	0.556492	2.25475	0.556492
0.0108449	1	0.558179	2.26336	0.558179
0.0108701	1	0.559865	2.27203	0.559865
0.0108907	1	0.561551	2.28077	0.561551
0.0109236	1	0.563238	2.28958	0.563238
0.0109712	1	0.564924	2.29845	0.564924
0.0110204	1	0.56661	2.30739	0.56661
0.0110602	1	0.568297	2.31641	0.568297
0.011094	1	0.569983	2.32549	0.569983
0.0111473	1	0.571669	2.33465	0.571669
0.0112264	1	0.573356	2.34387	0.573356
0.0112851	1	0.575042	2.35317	0.575042
0.0113342	1	0.576728	2.36255	0.576728
0.0113901	1	0.578415	2.372	0.578415
0.0115621	1	0.580101	2.38153	0.580101
0.0117637	1	0.581788	2.39113	0.581788
0.0118314	1	0.583474	2.40081	0.583474
0.0119158	1	0.58516	2.41057	0.58516
0.0121181	1	0.586847	2.42041	0.586847
0.0122998	1	0.588533	2.43033	0.588533
0.0124069	1	0.590219	2.44033	0.590219
0.0125056	1	0.591906	2.45041	0.591906
0.0125606	1	0.593592	2.46058	0.593592
0.0125736	1	0.595278	2.47083	0.595278
0.0125757	1	0.596965	2.48117	0.596965
0.0126371	1	0.598651	2.4916	0.598651
0.0128131	1	0.600337	2.50211	0.600337
0.0129622	1	0.602024	2.51271	0.602024
0.0130359	1	0.60371	2.5234	0.60371
0.0131735	1	0.605396	2.53419	0.605396
0.0132889	1	0.607083	2.54506	0.607083
0.0133091	1	0.608769	2.55603	0.608769
0.0133375	1	0.610455	2.5671	0.610455
0.0134866	1	0.612142	2.57826	0.612142
0.0136099	1	0.613828	2.58952	0.613828
0.0137633	1	0.615514	2.60088	0.615514
0.013939	1	0.617201	2.61233	0.617201
0.0140194	1	0.618887	2.62389	0.618887
0.0140991	1	0.620573	2.63556	0.620573
0.0141493	1	0.62226	2.64732	0.62226
0.0142595	1	0.623946	2.65919	0.623946
0.0143449	1	0.625632	2.67117	0.625632
0.014368	1	0.627319	2.68326	0.627319
0.0144452	1	0.629005	2.69545	0.629005
0.0145189	1	0.630691	2.70776	0.630691
0.0145651	1	0.632378	2.72018	0.632378
0.0146547	1	0.634064	2.73272	0.634064
0.0147296	1	0.63575	2.74537	0.63575
0.0149072	1	0.637437	2.75814	0.637437
0.0151351	1	0.639123	2.77103	0.639123
0.0152119	1	0.640809	2.78404	0.640809
0.0152606	1	0.642496	2.79717	0.642496
0.0153782	1	0.644182	2.81043	0.644182
0.0154591	1	0.645868	2.82381	0.645868
0.0155464	1	0.647555	2.83732	0.647555
0.0156381	1	0.649241	2.85096	0.649241
0.0156442	1	0.650927	2.86473	0.650927
0.0157118	1	0.652614	2.87864	0.652614
0.0159346	1	0.6543	2.89268	0.6543
0.0161166	1	0.655987	2.90686	0.655987
0.016174	1	0.657673	2.92118	0.657673
0.016207	1	0.659359	2.93564	0.659359
0.0162205	1	0.661046	2.95025	0.661046
0.0162641	1	0.662732	2.965	0.662732
0.0164337	1	0.664418	2.9799	0.664418
0.016617	1	0.666105	2.99495	0.666105
0.0166681	1	0.667791	3.01015	0.667791
0.0167281	1	0.669477	3.02551	0.669477
0.016793	1	0.671164	3.04103	0.671164
0.0168119	1	0.67285	3.0567	0.67285
0.0168557	1	0.674536	3.07254	0.674536
0.0169201	1	0.676223	3.08854	0.676223
0.0170357	1	0.677909	3.10471	0.677909
0.0175677	1	0.679595	3.12105	0.679595
0.0180926	1	0.681282	3.13757	0.681282
0.0182027	1	0.682968	3.15426	0.682968
0.0182725	1	0.684654	3.17112	0.684654
0.0184085	1	0.686341	3.18817	0.686341
0.0185286	1	0.688027	3.20541	0.688027
0.0186155	0.977778	0.688027	3.13417	0.665805
0.0188193	0.977778	0.689713	3.15121	0.667491
0.0190768	0.977778	0.6914	3.16843	0.669177
0.0192065	0.977778	0.693086	3.18584	0.670864
0.0192528	0.977778	0.694772	3.20344	0.67255
0.0192959	0.977778	0.696459	3.22123	0.674236
0.0194463	0.977778	0.698145	3.23923	0.675923
0.0196583	0.977778	0.699831	3.25743	0.677609
0.0199571	0.977778	0.701518	3.27583	0.679295
0.0202471	0.977778	0.703204	3.29444	0.680982
0.0203434	0.977778	0.70489	3.31327	0.682668
0.0206798	0.977778	0.706577	3.33231	0.684355
0.021093	0.955556	0.706577	3.25658	0.662132
0.0212187	0.955556	0.708263	3.2754	0.663819
0.0213003	0.955556	0.709949	3.29444	0.665505
0.0214469	0.955556	0.711636	3.31371	0.667191
0.0215702	0.955556	0.713322	3.3332	0.668878
0.0218009	0.955556	0.715008	3.35293	0.670564
0.0220308	0.955556	0.716695	3.37288	0.67225
0.0220964	0.955556	0.718381	3.39308	0.673937
0.0221427	0.955556	0.720067	3.41352	0.675623
0.022252	0.955556	0.721754	3.43421	0.677309
0.0225718	0.955556	0.72344	3.45515	0.678996
0.0228752	0.955556	0.725126	3.47635	0.680682
0.0232014	0.955556	0.726813	3.49781	0.682368
0.0236564	0.955556	0.728499	3.51953	0.684055
0.0241246	0.955556	0.730185	3.54153	0.685741
0.0243955	0.955556	0.731872	3.5638	0.687427
0.0247891	0.955556	0.733558	3.58636	0.689114
0.0254276	0.955556	0.735245	3.6092	0.6908
0.0258438	0.955556	0.736931	3.63234	0.692486
0.0260608	0.955556	0.738617	3.65577	0.694173
0.0262306	0.955556	0.740304	3.67951	0.695859
0.0263663	0.955556	0.74199	3.70356	0.697545
0.0264266	0.955556	0.743676	3.72792	0.699232
0.026656	0.955556	0.745363	3.75261	0.700918
0.0271999	0.955556	0.747049	3.77763	0.702604
0.0276643	0.933333	0.747049	3.68978	0.680382
0.0278976	0.933333	0.748735	3.71454	0.682069
0.0284896	0.933333	0.750422	3.73964	0.683755
0.0290214	0.933333	0.752108	3.76508	0.685441
0.0291745	0.933333	0.753794	3.79087	0.687128
0.0293071	0.933333	0.755481	3.81701	0.688814
0.0293747	0.933333	0.757167	3.84352	0.6905
0.0294097	0.933333	0.758853	3.8704	0.692187
0.029597	0.933333	0.76054	3.89765	0.693873
0.0299085	0.933333	0.762226	3.9253	0.695559
0.0304296	0.933333	0.763912	3.95333	0.697246
0.0308123	0.933333	0.765599	3.98177	0.698932
0.0313107	0.933333	0.767285	4.01063	0.700618
0.031914	0.933333	0.768971	4.0399	0.702305
0.0320635	0.933333	0.770658	4.06961	0.703991
0.0322401	0.911111	0.770658	3.97271	0.681769
0.0324386	0.911111	0.772344	4.00214	0.683455
0.0325443	0.911111	0.77403	4.03201	0.685141
0.0327237	0.911111	0.775717	4.06232	0.686828
0.0330535	0.911111	0.777403	4.0931	0.688514
0.0333958	0.911111	0.779089	4.12434	0.6902
0.0341371	0.911111	0.780776	4.15607	0.691887
0.0347608	0.911111	0.782462	4.18829	0.693573
0.0349623	0.911111	0.784148	4.22101	0.69526
0.0355068	0.911111	0.785835	4.25424	0.696946
0.0362747	0.911111	0.787521	4.28801	0.698632
0.0367499	0.911111	0.789207	4.32231	0.700319
0.0368475	0.911111	0.790894	4.35717	0.702005
0.0371967	0.911111	0.79258	4.39259	0.703691
0.0377636	0.911111	0.794266	4.4286	0.705378
0.0382447	0.911111	0.795953	4.4652	0.707064
0.0391992	0.911111	0.797639	4.50241	0.70875
0.0401187	0.911111	0.799325	4.54024	0.710437
0.0405632	0.911111	0.801012	4.57872	0.712123
0.0408586	0.911111	0.802698	4.61785	0.713809
0.0417149	0.911111	0.804384	4.65766	0.715496
0.0427559	0.911111	0.806071	4.69816	0.717182
0.0430681	0.911111	0.807757	4.73938	0.718868
0.0432484	0.911111	0.809444	4.78132	0.720555
0.044105	0.911111	0.81113	4.82401	0.722241
0.0457216	0.911111	0.812816	4.86747	0.723927
0.0468292	0.911111	0.814503	4.91172	0.725614
0.0473138	0.911111	0.816189	4.95678	0.7273
0.0482005	0.888889	0.816189	4.83588	0.705078
0.0489516	0.888889	0.817875	4.88066	0.706764
0.0490838	0.888889	0.819562	4.92627	0.70845
0.049255	0.888889	0.821248	4.97275	0.710137
0.0503471	0.888889	0.822934	5.02011	0.711823
0.0520648	0.888889	0.824621	5.06838	0.713509
0.0528883	0.888889	0.826307	5.11758	0.715196
0.0547015	0.888889	0.827993	5.16776	0.716882
0.0566769	0.888889	0.82968	5.21892	0.718568
0.0584071	0.888889	0.831366	5.27111	0.720255
0.060006	0.866667	0.831366	5.13933	0.698033
0.0607806	0.866667	0.833052	5.19125	0.699719
0.0616913	0.866667	0.834739	5.24422	0.701405
0.0619173	0.866667	0.836425	5.29828	0.703092
0.0628191	0.866667	0.838111	5.35347	0.704778
0.0641758	0.866667	0.839798	5.40982	0.706464
0.0647197	0.866667	0.841484	5.46738	0.708151
0.0649199	0.866667	0.84317	5.52616	0.709837
0.0654417	0.866667	0.844857	5.58623	0.711523
0.0663708	0.866667	0.846543	5.64762	0.71321
0.0672466	0.844444	0.846543	5.50281	0.690987
0.0685573	0.844444	0.848229	5.56395	0.692674
0.0697597	0.844444	0.849916	5.62647	0.69436
0.0702617	0.844444	0.851602	5.6904	0.696046
0.0714502	0.844444	0.853288	5.75581	0.697733
0.0724956	0.844444	0.854975	5.82274	0.699419
0.0728512	0.844444	0.856661	5.89124	0.701105
0.0737767	0.844444	0.858347	5.96138	0.702792
0.0747753	0.844444	0.860034	6.0332	0.704478
0.0756814	0.844444	0.86172	6.10678	0.706165
0.0763855	0.844444	0.863406	6.18217	0.707851
0.0767116	0.844444	0.865093	6.25944	0.709537
0.0778068	0.844444	0.866779	6.33868	0.711224
0.0792564	0.844444	0.868465	6.41994	0.71291
0.0814062	0.822222	0.868465	6.251	0.690688
0.0832578	0.822222	0.870152	6.33218	0.692374
0.0835531	0.822222	0.871838	6.4155	0.69406
0.0841973	0.822222	0.873524	6.50104	0.695747
0.0850254	0.822222	0.875211	6.58889	0.697433
0.0863916	0.822222	0.876897	6.67915	0.699119
0.0886181	0.8	0.876897	6.49863	0.676897
0.089785	0.8	0.878583	6.58889	0.678583
0.0901395	0.8	0.88027	6.68169	0.68027
0.0905305	0.8	0.881956	6.77714	0.681956
0.0919012	0.8	0.883642	6.87536	0.683642
0.0932317	0.8	0.885329	6.97647	0.685329
0.0952315	0.8	0.887015	7.0806	0.687015
0.0988638	0.8	0.888702	7.18788	0.688702
0.102113	0.8	0.890388	7.29846	0.690388
0.1044	0.777778	0.890388	7.09573	0.668166
0.105533	0.777778	0.892074	7.2066	0.669852
0.1064	0.777778	0.893761	7.32099	0.671538
0.107727	0.777778	0.895447	7.43907	0.673225
0.108589	0.777778	0.897133	7.56102	0.674911
0.108757	0.755556	0.897133	7.34499	0.652689
0.109077	0.755556	0.89882	7.46741	0.654375
0.110442	0.755556	0.900506	7.59397	0.656061
0.112454	0.755556	0.902192	7.7249	0.657748
0.113545	0.755556	0.903879	7.86043	0.659434
0.114083	0.755556	0.905565	8.00079	0.66112
0.115128	0.755556	0.907251	8.14626	0.662807
0.116869	0.755556	0.908938	8.29712	0.664493
0.118491	0.755556	0.910624	8.45367	0.66618
0.121703	0.755556	0.91231	8.61624	0.667866
0.125095	0.755556	0.913997	8.78519	0.669552
0.12592	0.755556	0.915683	8.96089	0.671239
0.126695	0.755556	0.917369	9.14376	0.672925
0.130074	0.755556	0.919056	9.33426	0.674611
0.133277	0.733333	0.919056	9.05972	0.652389
0.137397	0.733333	0.920742	9.25248	0.654075
0.141284	0.733333	0.922428	9.45362	0.655762
0.141763	0.711111	0.922428	9.16715	0.633539
0.14678	0.711111	0.924115	9.37086	0.635226
0.152146	0.711111	0.925801	9.58384	0.636912
0.154237	0.711111	0.927487	9.80672	0.638598
0.157818	0.711111	0.929174	10.0402	0.640285
0.16145	0.711111	0.93086	10.2851	0.641971
0.163873	0.711111	0.932546	10.5422	0.643657
0.165591	0.711111	0.934233	10.8125	0.645344
0.17104	0.711111	0.935919	11.0971	0.64703
0.175655	0.711111	0.937605	11.397	0.648717
0.176498	0.711111	0.939292	11.7136	0.650403
0.178507	0.688889	0.939292	11.3475	0.628181
0.18171	0.688889	0.940978	11.6717	0.629867
0.184077	0.688889	0.942664	12.015	0.631553
0.191106	0.666667	0.942664	11.6275	0.609331
0.198771	0.666667	0.944351	11.9798	0.611017
0.201654	0.666667	0.946037	12.3542	0.612704
0.205137	0.666667	0.947723	12.7527	0.61439
0.207167	0.666667	0.94941	13.1778	0.616076
0.208069	0.644444	0.94941	12.7385	0.593854
0.210316	0.644444	0.951096	13.1778	0.595541
0.212738	0.644444	0.952782	13.6484	0.597227
0.21535	0.644444	0.954469	14.1539	0.598913
0.220531	0.644444	0.956155	14.6983	0.6006
0.225113	0.644444	0.957841	15.2862	0.602286
0.232326	0.644444	0.959528	15.9231	0.603972
0.241803	0.644444	0.961214	16.6155	0.605659
0.258573	0.644444	0.962901	17.3707	0.607345
0.273161	0.622222	0.962901	16.7717	0.585123
0.286369	0.622222	0.964587	17.5704	0.586809
0.316388	0.6	0.964587	16.9429	0.564587
0.336277	0.577778	0.964587	16.3153	0.542365
0.341798	0.577778	0.966273	17.1311	0.544051
0.345645	0.555556	0.966273	16.4722	0.521829
0.346023	0.533333	0.966273	15.8133	0.499607
0.351298	0.533333	0.96796	16.6456	0.501293
0.358051	0.511111	0.96796	15.952	0.479071
0.361019	0.511111	0.969646	16.8383	0.480757
0.365765	0.511111	0.971332	17.8288	0.482443
0.376736	0.511111	0.973019	18.9431	0.48413
0.396051	0.511111	0.974705	20.2059	0.485816
0.420545	0.511111	0.976391	21.6492	0.487502
0.435856	0.511111	0.978078	23.3145	0.489189
0.445854	0.488889	0.978078	22.3009	0.466966
0.453266	0.466667	0.978078	21.2872	0.444744
0.45612	0.444444	0.978078	20.2735	0.422522
0.459557	0.444444	0.979764	21.963	0.424208
0.46175	0.444444	0.98145	23.9596	0.425895
0.4637	0.422222	0.98145	22.7616	0.403672
0.464403	0.422222	0.983137	25.0378	0.405359
0.487589	0.422222	0.984823	27.8198	0.407045
0.524977	0.422222	0.986509	31.2972	0.408731
0.548826	0.4	0.986509	29.65	0.386509
0.560644	0.4	0.988196	33.8857	0.388196
0.575037	0.377778	0.988196	32.0032	0.365973
0.591752	0.355556	0.988196	30.1206	0.343751
0.597422	0.355556	0.989882	35.1407	0.345438
0.609157	0.355556	0.991568	42.1689	0.347124
0.629238	0.333333	0.991568	39.5333	0.324902
0.638737	0.311111	0.991568	36.8978	0.302679
0.639358	0.311111	0.993255	46.1222	0.304366
0.64642	0.311111	0.994941	61.4963	0.306052
0.65414	0.311111	0.996627	92.2444	0.307738
0.665825	0.288889	0.996627	85.6556	0.285516
0.680199	0.266667	0.996627	79.0667	0.263294
0.705147	0.244444	0.996627	72.4778	0.241072
0.728886	0.244444	0.998314	144.956	0.242758
0.731652	0.222222	0.998314	131.778	0.220536
0.746563	0.2	0.998314	118.6	0.198314
0.776967	0.177778	0.998314	105.422	0.176091
0.798424	0.155556	0.998314	92.2444	0.153869
0.807617	0.133333	0.998314	79.0667	0.131647
0.812267	0.111111	0.998314	65.8889	0.109425
0.843856	0.0888889	0.998314	52.7111	0.0872025
0.874251	0.0888889	1		0.0888889
0.90623	0.0666667	1		0.0666667
0.944826	0.0444444	1		0.0444444
0.954512	0.0222222	1		0.0222222
1	0	1		0
